# Supplementary material for: Validity and responsiveness of the Global Physical Activity Questionnaire (GPAQ) in assessing physical activity during pregnancy
Source: PubMed Central journal article supplement (PMC5446115; doi:10.1371/journal.pone.0177996), 2017-05-26
Supplement: pone.0177996.s001.pdf [file pone.0177996.s001.pdf]

| Patient ID | Age   | Height <14 weeks(cm) | Weight at <14 weeks (kg) | Weight at 14-18 weeks (kg) | Weight at 19-23 weeks (kg) | Weight at 24-28 weeks (kg) | Weight at 29-33 weeks (kg) | Weight at 34-38 weeks (kg) | Weight gain 34-38 weeks (kg) | BMI <14 weeks | BMI Classification | Marital Status  | Level of Education | Employment Status |
|------------|-------|----------------------|--------------------------|----------------------------|----------------------------|----------------------------|----------------------------|----------------------------|------------------------------|---------------|--------------------|-----------------|--------------------|-------------------|
| GPAQ001    | 21.00 | 148.50               | 65.90                    | 69.00                      | 74.50                      | 80.40                      | 84.40                      |                            |                              | 29.88         | Overweight         | Married/cohab   | Secondary          | Nonmanual         |
| GPAQ002    | 23.00 | 164.30               | 79.80                    | 77.70                      | 79.10                      | 83.00                      | 84.50                      | 87.80                      | 8.00                         | 29.56         | Overweight         | Single/divorced | Secondary          | Nonmanual         |
| GPAQ003    | 25.00 | 153.40               | 53.40                    | 56.40                      | 56.70                      | 55.50                      | 56.10                      | 60.00                      | 6.60                         | 22.69         | Normal             | Single/divorced | Secondary          | Manual work       |
| GPAQ004    | 31.00 | 160.70               | 65.90                    | 67.30                      | 70.60                      | 70.80                      | 72.10                      | 75.90                      | 10.00                        | 25.52         | Overweight         | Single/divorced | Secondary          | Manual work       |
| GPAQ005    | 27.00 | 142.60               | 56.10                    | 58.70                      | 63.10                      | 64.30                      | 67.30                      | 69.40                      | 13.30                        | 27.59         | Overweight         | Married/cohab   | Secondary          | Nonmanual         |
| GPAQ006    | 37.00 | 159.10               | 85.10                    | 83.90                      | 84.00                      | 82.30                      | 86.60                      |                            |                              | 33.62         | Obese              | Married/cohab   | Secondary          | Unemployed/o      |
| GPAQ007    | 29.00 | 155.80               | 63.80                    | 65.10                      | 66.30                      | 68.30                      | 70.40                      | 79.30                      | 15.50                        | 26.28         | Overweight         | Single/divorced | Professional/te    | Nonmanual         |
| GPAQ008    | 32.00 | 163.30               | 64.00                    | 67.20                      | 72.40                      | 76.00                      | 81.90                      |                            |                              | 24.00         | Normal             | Single/divorced | Secondary          | Manual work       |
| GPAQ009    | 37.00 | 165.70               | 73.50                    | 76.60                      | 76.90                      | 78.10                      | 80.40                      |                            |                              | 26.77         | Overweight         | Married/cohab   | Secondary          | Nonmanual         |
| GPAQ010    | 24.00 | 155.10               | 67.90                    | 70.30                      | 72.40                      | 76.20                      | 77.70                      | 82.90                      | 15.00                        | 28.23         | Overweight         | Single/divorced | Professional/te    | Nonmanual         |
| GPAQ011    | 35.00 | 165.10               | 93.30                    | 95.10                      | 98.70                      | 98.70                      | 101.60                     | 101.50                     | 8.20                         | 34.23         | Obese              | Single/divorced | Professional/te    | Manual work       |
| GPAQ012    | 41.00 | 156.70               | 58.80                    | 60.00                      | 62.20                      | 63.50                      | 64.90                      | 66.90                      | 8.10                         | 23.95         | Normal             | Married/cohab   | Secondary          | Unemployed/o      |
| GPAQ013    | 24.00 | 167.10               | 56.50                    | 57.90                      | 60.50                      | 62.60                      | 65.10                      |                            |                              | 20.23         | Normal             | Married/cohab   | Professional/te    | Nonmanual         |
| GPAQ014    | 29.00 | 166.70               | 78.50                    | 81.40                      | 85.80                      | 89.50                      | 92.30                      | 94.50                      | 16.00                        | 28.25         | Overweight         | Married/cohab   | Professional/te    | Unemployed/o      |
| GPAQ015    | 34.00 | 154.30               | 68.80                    | 68.80                      | 71.20                      | 71.60                      | 74.70                      | 74.70                      | 5.90                         | 28.90         | Overweight         | Married/cohab   | Secondary          | Unemployed/o      |
| GPAQ016    | 37.00 | 161.00               | 64.10                    | 61.70                      | 61.80                      | 62.00                      | 64.30                      | 65.20                      | 1.10                         | 24.73         | Normal             | Single/divorced | Secondary          | Unemployed/o      |
| GPAQ017    | 31.00 | 152.00               | 59.00                    | 59.50                      | 65.10                      | 67.50                      | 70.80                      | 75.10                      | 16.10                        | 25.54         | Overweight         | Single/divorced | Secondary          | Nonmanual         |
| GPAQ018    | 30.00 | 159.00               | 71.00                    | 72.10                      | 74.70                      | 77.20                      | 78.90                      | 78.90                      | 7.90                         | 28.08         | Overweight         | Married/cohab   | Secondary          | Unemployed/o      |
| GPAQ019    | 32.00 | 163.00               | 49.60                    | 48.80                      | 51.80                      | 53.70                      | 57.00                      | 59.90                      | 10.30                        | 18.67         | Normal             | Single/divorced | Secondary          | Unemployed/o      |
| GPAQ020    | 39.00 | 166.60               | 86.40                    | 87.30                      | 89.10                      | 89.60                      | 91.60                      | 92.10                      | 5.70                         | 31.13         | Obese              | Single/divorced | Professional/te    | Manual work       |
| GPAQ021    | 33.00 | 162.30               | 62.50                    | 62.30                      | 65.70                      | 70.20                      | 72.60                      | 72.60                      | 10.10                        | 23.73         | Normal             | Married/cohab   | Secondary          | Unemployed/o      |
| GPAQ022    | 34.00 | 166.00               | 54.00                    | 56.10                      | 60.00                      | 62.40                      | 66.20                      | 68.50                      | 14.50                        | 19.60         | Normal             | Married/cohab   | Secondary          | Nonmanual         |
| GPAQ023    | 27.00 | 154.40               | 45.50                    | 47.60                      | 49.80                      | 52.80                      | 53.30                      | 53.30                      | 7.80                         | 19.09         | Normal             | Single/divorced | Professional/te    | Nonmanual         |
| GPAQ024    | 21.00 | 156.80               | 46.80                    | 46.70                      | 48.00                      | 49.20                      | 49.90                      | 54.00                      | 7.20                         | 19.04         | Normal             | Single/divorced | Secondary          | Unemployed/o      |
| GPAQ025    | 27.00 | 148.90               | 60.00                    | 61.90                      | 64.90                      | 64.70                      | 64.30                      | 64.30                      | 4.30                         | 27.06         | Overweight         | Married/cohab   | Secondary          | Unemployed/o      |
| GPAQ026    | 29.00 | 164.90               | 94.10                    | 96.10                      |                            |                            |                            |                            |                              | 34.61         | Obese              | Married/cohab   | Secondary          | Nonmanual         |
| GPAQ027    | 36.00 | 170.00               | 73.70                    | 75.60                      | 80.30                      | 88.60                      | 91.30                      | 91.30                      | 17.60                        | 25.50         | Overweight         | Single/divorced | Secondary          | Nonmanual         |
| GPAQ028    | 32.00 | 151.50               | 61.70                    | 62.80                      | 65.00                      | 65.80                      | 66.40                      | 67.20                      | 5.50                         | 26.88         | Overweight         | Married/cohab   | Professional/te    | Unemployed/o      |
| GPAQ029    | 30.00 | 164.80               | 49.50                    | 51.70                      | 53.80                      | 59.90                      | 60.40                      | 64.50                      | 15.00                        | 18.23         | Underweight        | Single/divorced | Secondary          | Unemployed/o      |
| GPAQ030    | 34.00 | 148.90               | 70.50                    | 73.40                      | 75.60                      | 77.20                      | 79.60                      | 81.20                      | 10.70                        | 31.80         | Obese              | Married/cohab   | Professional/te    | Unemployed/o      |
| GPAQ031    | 24.00 | 156.30               | 63.10                    | 64.60                      | 66.40                      | 68.90                      | 72.70                      | 76.00                      | 12.90                        | 25.83         | Overweight         | Single/divorced | Secondary          | Unemployed/o      |
| GPAQ032    | 37.00 | 158.20               | 74.70                    | 72.20                      | 80.20                      | 83.10                      | 86.50                      | 90.50                      | 15.80                        | 29.85         | Overweight         | Married/cohab   | Secondary          | Unemployed/o      |
| GPAQ033    | 35.00 | 161.80               | 60.10                    | 61.50                      | 65.90                      | 67.20                      | 70.10                      | 73.10                      | 13.00                        | 22.96         | Normal             | Single/divorced | Secondary          | Nonmanual         |
| GPAQ034    | 28.00 | 154.90               | 55.80                    | 56.50                      | 60.40                      | 62.50                      | 65.30                      | 69.30                      | 13.50                        | 23.26         | Normal             | Married/cohab   | Primary            | Unemployed/o      |
| GPAQ035    | 41.00 | 150.60               | 55.20                    | 55.10                      | 57.60                      |                            |                            | 60.70                      | 5.50                         | 24.34         | Normal             | Single/divorced | Secondary          | Unemployed/o      |
| GPAQ036    | 20.00 | 160.80               | 69.60                    | 70.50                      | 72.30                      | 74.90                      | 78.60                      | 82.00                      | 12.40                        | 26.92         | Overweight         | Married/cohab   | Secondary          | Unemployed/o      |
| GPAQ037    | 28.00 | 164.00               | 79.40                    | 79.80                      | 82.60                      | 85.60                      | 85.60                      | 88.50                      | 9.10                         | 29.52         | Overweight         | Single/divorced | Professional/te    | Manual work       |
| GPAQ038    | 31.00 | 155.10               | 71.80                    | 73.50                      |                            |                            |                            |                            |                              | 29.85         | Overweight         | Married/cohab   | Secondary          | Unemployed/o      |

|         |       |        |       |       |       |       |        |        |       |       |             |                 |                 |              |
|---------|-------|--------|-------|-------|-------|-------|--------|--------|-------|-------|-------------|-----------------|-----------------|--------------|
| GPAQ039 | 28.00 | 160.10 | 72.70 | 72.20 | 72.80 | 72.40 | 72.40  | 74.00  | 1.30  | 28.36 | Overweight  | Married/cohab   | Secondary       | Unemployed/o |
| GPAQ040 | 35.00 | 160.70 | 66.20 | 68.50 | 68.50 | 69.10 | 71.70  | 71.70  | 5.50  | 25.63 | Overweight  | Single/divorced | Professional/te | Nonmanual    |
| GPAQ041 | 41.00 | 166.70 | 82.70 | 81.40 | 82.60 | 84.10 | 82.90  | 81.30  | -1.40 | 29.76 | Overweight  | Single/divorced | Secondary       | Manual work  |
| GPAQ042 | 27.00 | 161.60 | 78.80 | 80.60 | 80.70 | 84.30 |        | 84.30  | 5.50  | 30.17 | Obese       | Single/divorced | Secondary       | Manual work  |
| GPAQ043 | 24.00 | 149.90 | 68.90 | 69.50 | 70.60 | 71.90 | 72.40  | 72.40  | 3.50  | 30.66 | Obese       |                 | Secondary       | Unemployed/o |
| GPAQ044 | 33.00 | 162.30 | 72.80 | 75.00 | 75.60 | 77.20 |        | 77.20  | 4.40  | 27.64 | Overweight  | Single/divorced | Secondary       | Unemployed/o |
| GPAQ045 | 22.00 | 162.30 | 68.00 | 68.40 | 72.00 | 74.40 | 86.10  | 77.50  | 9.50  | 25.81 | Overweight  | Single/divorced | Professional/te | Unemployed/o |
| GPAQ046 | 36.00 | 155.10 | 51.20 | 53.60 | 56.20 | 56.10 | 57.80  | 61.00  | 9.80  | 21.28 | Normal      | Single/divorced | Secondary       | Unemployed/o |
| GPAQ047 | 21.00 | 158.70 | 53.40 | 54.90 | 57.50 | 61.80 | 65.20  | 70.20  | 16.80 | 21.20 | Normal      | Single/divorced | Secondary       | Unemployed/o |
| GPAQ048 | 29.00 | 149.00 | 63.80 | 65.30 | 68.20 | 71.80 | 74.90  | 75.20  | 11.40 | 28.74 | Overweight  | Married/cohab   | Professional/te | Nonmanual    |
| GPAQ049 | 24.00 | 154.30 | 71.30 | 72.40 | 74.50 | 75.50 | 79.50  | 83.60  | 12.30 | 29.95 | Overweight  | Single/divorced | Secondary       | Unemployed/o |
| GPAQ050 | 28.00 | 157.60 | 73.00 | 73.20 | 74.40 | 77.60 | 79.30  | 82.00  | 9.00  | 29.39 | Overweight  | Married/cohab   | Secondary       | Unemployed/o |
| GPAQ051 | 34.00 | 157.80 | 59.70 | 60.30 | 62.00 | 63.00 | 65.30  | 66.20  | 6.50  | 23.98 | Normal      | Single/divorced | Secondary       | Unemployed/o |
| GPAQ052 | 26.00 | 144.60 | 67.20 | 67.30 | 68.60 | 68.70 | 71.70  | 70.20  | 3.00  | 32.14 | Obese       | Single/divorced | Professional/te | Manual work  |
| GPAQ053 | 24.00 | 158.00 | 74.40 | 77.50 | 82.10 | 84.40 | 87.20  | 91.10  | 16.70 | 29.80 | Overweight  | Single/divorced | Secondary       | Unemployed/o |
| GPAQ054 | 30.00 | 158.00 | 45.70 | 55.50 | 49.40 | 53.00 | 55.30  | 57.00  | 11.30 | 18.31 | Underweight | Single/divorced | Secondary       | Manual work  |
| GPAQ055 | 31.00 | 160.60 | 55.20 | 57.60 | 60.50 | 63.40 | 64.00  | 64.00  | 8.80  | 21.40 | Normal      | Single/divorced | Secondary       | Unemployed/o |
| GPAQ056 | 27.00 | 169.50 | 82.10 | 82.40 | 83.60 | 87.30 | 91.60  | 91.60  | 9.50  | 28.58 | Overweight  | Married/cohab   | Professional/te | Unemployed/o |
| GPAQ057 | 37.00 | 152.30 | 64.20 | 61.40 | 67.90 |       |        |        |       | 27.68 | Overweight  | Single/divorced | Secondary       | Unemployed/o |
| GPAQ058 | 34.00 | 152.80 | 70.90 | 73.50 | 74.80 | 76.10 | 75.80  | 78.00  | 7.10  | 30.37 | Obese       | Married/cohab   | Secondary       | Unemployed/o |
| GPAQ059 | 27.00 | 161.90 | 50.90 | 52.30 | 53.50 | 56.10 | 58.30  | 58.30  | 7.40  | 19.42 | Normal      | Single/divorced | Secondary       | Unemployed/o |
| GPAQ060 | 27.00 | 165.40 | 87.50 | 86.70 | 88.40 | 91.00 | 92.80  | 94.00  | 6.50  | 31.98 | Obese       | Married/cohab   | Professional/te | Unemployed/o |
| GPAQ061 | 43.00 | 156.70 | 68.20 | 70.90 | 70.10 | 71.30 | 72.30  | 73.80  | 5.60  | 27.77 | Overweight  | Single/divorced | Professional/te | Unemployed/o |
| GPAQ062 | 28.00 | 161.10 | 69.20 | 70.00 | 71.80 | 73.40 | 74.10  | 75.40  | 6.20  | 26.66 | Overweight  | Single/divorced | Secondary       | Manual work  |
| GPAQ063 | 38.00 | 154.00 | 70.00 | 72.90 | 72.50 | 71.20 | 72.80  | 72.80  | 2.80  | 29.52 | Overweight  | Single/divorced | Primary         | Unemployed/o |
| GPAQ064 | 30.00 | 151.10 | 65.60 | 66.40 | 67.90 | 67.90 |        | 67.90  | 2.30  | 28.73 | Overweight  | Single/divorced | Secondary       | Unemployed/o |
| GPAQ065 | 24.00 | 165.90 | 61.10 | 62.00 | 63.20 | 66.80 |        | 71.50  | 10.40 | 22.20 | Normal      | Single/divorced | Professional/te | Unemployed/o |
| GPAQ066 | 39.00 | 155.80 | 78.70 | 74.60 | 77.00 | 78.10 | 77.80  | 77.80  | -0.90 | 32.42 | Obese       | Single/divorced | Primary         | Unemployed/o |
| GPAQ067 | 26.00 | 147.00 | 53.60 | 57.40 | 60.10 | 63.00 | 66.30  | 66.30  | 12.70 | 24.80 | Normal      | Single/divorced | Secondary       | Manual work  |
| GPAQ068 | 32.00 | 166.60 | 64.70 | 64.70 |       |       |        |        |       | 23.31 | Normal      | Married/cohab   | Secondary       | Manual work  |
| GPAQ069 | 32.00 | 163.10 | 72.00 | 73.10 | 75.30 | 76.90 | 78.00  | 80.10  | 8.10  | 27.07 | Overweight  | Single/divorced | Secondary       | Unemployed/o |
| GPAQ070 | 23.00 | 160.80 | 57.70 | 61.70 | 64.60 | 68.50 | 69.60  | 70.90  | 13.20 | 22.32 | Normal      | Single/divorced | Secondary       | Nonmanual    |
| GPAQ071 | 30.00 | 158.20 | 74.50 | 76.60 | 77.70 | 79.70 | 81.10  | 83.50  | 9.00  | 29.77 | Overweight  | Married/cohab   | Secondary       | Manual work  |
| GPAQ072 | 31.00 | 167.40 | 89.60 | 94.00 | 93.10 | 94.70 | 100.40 | 100.90 | 11.30 | 31.97 | Obese       | Married/cohab   | Professional/te | Unemployed/o |
| GPAQ073 | 31.00 | 153.50 | 44.90 | 46.00 | 45.90 | 47.70 | 48.70  | 49.10  | 4.20  | 19.06 | Normal      | Single/divorced | Primary         | Unemployed/o |
| GPAQ074 | 20.00 | 156.20 | 60.20 | 61.90 | 63.80 | 63.40 | 66.00  |        |       | 24.67 | Normal      | Married/cohab   | Professional/te | Nonmanual    |
| GPAQ075 | 27.00 | 158.20 | 75.70 | 76.50 | 77.30 | 79.80 | 84.10  | 85.70  |       | 30.25 | Obese       | Married/cohab   | Professional/te | Unemployed/o |
| GPAQ076 | 32.00 | 153.40 | 53.30 | 58.20 | 63.50 | 63.50 | 63.30  | 66.10  |       | 22.65 | Normal      | Single/divorced | Secondary       | Manual work  |
| GPAQ077 | 27.00 | 143.90 | 55.40 | 56.40 | 57.30 | 58.40 | 59.40  | 60.60  |       | 26.75 | Overweight  | Single/divorced | Primary         | Unemployed/o |
| GPAQ078 | 29.00 | 156.30 | 59.10 | 60.80 | 63.30 | 64.40 | 67.80  |        |       | 24.19 | Normal      | Married/cohab   | Secondary       | Unemployed/o |
| GPAQ079 | 24.00 | 156.80 | 50.80 | 53.40 | 55.60 | 56.30 | 59.50  | 59.50  | 8.70  | 20.66 | Normal      | Single/divorced | Professional/te | Nonmanual    |
| GPAQ080 | 24.00 | 157.40 | 52.10 | 53.00 | 56.50 | 56.90 | 58.80  | 56.90  | 4.80  | 21.03 | Normal      | Single/divorced | Secondary       | Unemployed/o |

|         |       |        |        |        |        |        |        |        |       |       |            |                 |                 |              |
|---------|-------|--------|--------|--------|--------|--------|--------|--------|-------|-------|------------|-----------------|-----------------|--------------|
| GPAQ081 | 24.00 | 146.10 | 47.10  | 47.60  | 49.50  | 50.60  | 52.50  | 56.30  | 9.20  | 22.07 | Normal     | Single/divorced | Secondary       | Unemployed/o |
| GPAQ082 | 23.00 | 159.80 | 48.00  | 48.00  | 49.70  | 50.00  |        | 54.40  | 6.40  | 18.80 | Normal     | Single/divorced | Professional/te | Nonmanual    |
| GPAQ083 | 24.00 | 165.20 | 71.60  | 73.60  | 74.30  | 74.60  | 75.00  | 75.00  | 3.40  | 26.24 | Overweight | Single/divorced | Professional/te | Nonmanual    |
| GPAQ084 | 22.00 | 157.00 | 87.30  | 89.00  | 90.90  | 92.90  | 95.10  | 95.10  | 7.80  | 35.42 | Obese      | Married/cohab   | Professional/te | Unemployed/o |
| GPAQ085 | 22.00 | 155.70 | 98.80  | 102.30 | 105.70 | 107.30 | 109.20 | 111.10 | 12.30 | 40.75 | Obese      | Single/divorced | Secondary       | Manual work  |
| GPAQ086 | 21.00 | 157.80 | 71.90  | 73.20  | 77.10  | 80.60  | 85.50  | 87.40  | 15.50 | 28.87 | Overweight | Single/divorced | Professional/te | Nonmanual    |
| GPAQ087 | 20.00 | 165.70 | 55.60  | 60.40  | 61.30  | 62.50  | 67.00  |        |       | 20.25 | Normal     | Single/divorced | Professional/te | Manual work  |
| GPAQ088 | 22.00 | 163.00 | 82.40  | 83.20  | 84.30  | 86.90  | 88.20  | 90.60  | 8.20  | 31.01 | Obese      | Single/divorced | Professional/te | Nonmanual    |
| GPAQ089 | 29.00 | 147.60 | 56.40  | 53.20  | 55.50  | 57.60  | 59.80  | 59.80  | 3.40  | 25.89 | Overweight | Married/cohab   | Professional/te | Unemployed/o |
| GPAQ090 | 34.00 | 166.00 | 70.90  | 73.10  | 75.00  | 76.30  | 79.30  | 79.30  | 8.40  | 25.73 | Overweight | Married/cohab   | Professional/te | Unemployed/o |
| GPAQ091 | 36.00 | 151.90 | 54.90  | 56.10  | 57.40  | 59.80  | 58.30  | 58.30  | 3.40  | 23.79 | Normal     | Single/divorced | Secondary       | Unemployed/o |
| GPAQ092 | 30.00 | 155.00 | 86.60  | 88.30  | 90.80  | 93.00  | 96.40  | 96.40  | 9.80  | 36.05 | Obese      | Single/divorced | Secondary       | Nonmanual    |
| GPAQ093 | 37.00 | 157.10 | 92.70  | 94.60  | 96.70  | 96.20  | 96.50  |        |       | 37.56 | Obese      | Married/cohab   | Secondary       | Manual work  |
| GPAQ094 | 35.00 | 160.70 | 101.70 | 101.10 | 104.20 | 101.90 | 104.90 |        |       | 39.38 | Obese      | Single/divorced | Secondary       | Unemployed/o |
| GPAQ095 | 24.00 | 166.90 | 114.20 | 111.90 | 114.60 | 116.10 |        |        |       | 41.00 | Obese      | Married/cohab   | Secondary       | Unemployed/o |

| Household inventory (/9) | Number of Children | V2_P16_Total | V2_PtotalMIN | Quartiles of PA_GPAQ | V2_Ptotal_ME | V2_Ptotalday | V2_GPAQ Mee | Sedentary | Light   | Total MVPA | V2_Accelerom | Accelerometer | Quartiles of ac |
|--------------------------|--------------------|--------------|--------------|----------------------|--------------|--------------|-------------|-----------|---------|------------|--------------|---------------|-----------------|
| 3.00                     | 0.00               | 30.00        | 38.57        | 3.00                 | 1080.00      | 154.29       | Active      | 2632.5    | 836     | 275.5      | 1.00         | 34.438        | 3.00            |
| 5.00                     | 0.00               | 480.00       | 10.71        | 2.00                 | 300.00       | 42.86        | Inactive    | 3796.5    | 1110.75 | 176.75     | 1.00         | 25.25         | 2.00            |
| 1.00                     | 1.00               | 240.00       | 25.71        | 3.00                 | 720.00       | 102.86       | Active      | 2805.75   | 899.75  | 183.5      | 1.00         | 22.938        | 2.00            |
| 6.00                     | 0.00               | 720.00       | 12.86        | 2.00                 | 360.00       | 51.43        | Inactive    | 4372.25   | 1626    | 359.75     | 1.00         | 44.969        | 4.00            |
| 7.00                     | 1.00               | 600.00       | 25.71        | 3.00                 | 720.00       | 102.86       | Active      | 4666.75   | 1038.5  | 297.75     | 1.00         | 42.536        | 4.00            |
| 5.00                     | 2.00               | 420.00       | 10.71        | 2.00                 | 300.00       | 42.86        | Inactive    | 3362.25   | 2324.75 | 474        | 1.00         | 67.714        | 4.00            |
| 7.00                     | 0.00               |              | 7.14         | 1.00                 | 200.00       | 28.57        | Inactive    | 2976.75   | 977.75  | 288.5      | 1.00         | 36.063        | 3.00            |
| 6.00                     | 1.00               | 840.00       | 5.71         | 1.00                 | 160.00       | 22.86        | Inactive    | 3617.5    | 1663.25 | 94.25      | 0.00         | 11.781        | 1.00            |
| 6.00                     | 0.00               | 120.00       | 28.57        | 3.00                 | 800.00       | 114.29       | Active      | 4144.25   | 1059.25 | 163.5      | 1.00         | 23.357        | 2.00            |
| 7.00                     | 1.00               | 30.00        | 68.57        | 4.00                 | 1920.00      | 274.29       | Active      | 1996.25   | 508     | 100.75     | 0.00         | 20.15         | 2.00            |
| 7.00                     | 2.00               | 480.00       | 27.14        | 3.00                 | 760.00       | 108.57       | Active      | 4749.75   | 1396.75 | 140.5      | 0.00         | 20.071        | 2.00            |
| 5.00                     | 3.00               | 480.00       | 42.86        | 4.00                 | 1200.00      | 171.43       | Active      | 3860.25   | 990.5   | 169.25     | 1.00         | 24.179        | 2.00            |
| 7.00                     | 1.00               | 500.00       | 0.00         | 1.00                 | 0.00         | 0.00         | Inactive    | 3038.5    | 762.25  | 27.25      | 0.00         | 4.542         | 1.00            |
| 6.00                     | 1.00               | 420.00       | 32.86        | 3.00                 | 920.00       | 131.43       | Active      | 1545.75   | 893     | 183.25     | 1.00         | 36.65         | 3.00            |
| 6.00                     | 1.00               | 420.00       | 4.29         | 1.00                 | 120.00       | 17.14        | Inactive    | 1748.75   | 1506    | 202.25     | 1.00         | 28.893        | 3.00            |
| 7.00                     | 0.00               | 120.00       | 17.14        | 2.00                 | 480.00       | 68.57        | Inactive    | 1829      | 849     | 203        | 1.00         | 29            | 3.00            |
| 5.00                     | 0.00               | 300.00       | 14.29        | 2.00                 | 400.00       | 57.14        | Inactive    | 3582.75   | 2182    | 140.25     | 0.00         | 20.036        | 2.00            |
| 5.00                     | 2.00               | 300.00       | 34.29        | 3.00                 | 960.00       | 137.14       | Active      | 2471.25   | 1132.5  | 150.25     | 1.00         | 21.464        | 2.00            |
| 5.00                     | 2.00               | 90.00        | 8.57         | 1.00                 | 240.00       | 34.29        | Inactive    | 4013.75   | 1082.75 | 120.5      | 0.00         | 17.214        | 1.00            |
| 6.00                     | 2.00               |              | 25.71        | 3.00                 | 720.00       | 102.86       | Active      | 3596      | 1891.75 | 236.25     | 1.00         | 33.75         | 3.00            |
| 5.00                     | 2.00               | 360.00       | 8.57         | 1.00                 | 240.00       | 34.29        | Inactive    | 2574.75   | 920.75  | 109.5      | 0.00         | 15.643        | 1.00            |
| 5.00                     | 1.00               | 420.00       | 2.86         | 1.00                 | 80.00        | 11.43        | Inactive    | 2171.25   | 1452.75 | 628        | 1.00         | 104.667       | 4.00            |
| 3.00                     | 0.00               |              | 15.00        | 2.00                 | 420.00       | 60.00        | Inactive    |           |         |            |              |               |                 |
| 6.00                     | 1.00               | 120.00       | 5.71         | 1.00                 | 160.00       | 22.86        | Inactive    | 4321.75   | 1475.75 | 182.5      | 1.00         | 26.071        | 2.00            |
| 5.00                     | 1.00               | 600.00       | 42.86        | 4.00                 | 1200.00      | 171.43       | Active      | 3204.5    | 1373    | 265.5      | 1.00         | 37.929        | 4.00            |
| 6.00                     | 1.00               | 60.00        | 8.57         | 1.00                 | 240.00       | 34.29        | Inactive    | 1708.5    | 1239.5  | 173        | 1.00         | 24.714        | 2.00            |
| 4.00                     | 0.00               | 60.00        | 192.86       | 4.00                 | 5400.00      | 771.43       | Active      | 3099      | 1903.75 | 313.25     | 1.00         | 44.75         | 4.00            |
| 7.00                     | 2.00               | 420.00       | 4.29         | 1.00                 | 120.00       | 17.14        | Inactive    | 3852.5    | 1820.25 | 205.25     | 1.00         | 29.321        | 3.00            |
| 5.00                     | 1.00               | 240.00       | 1.43         | 1.00                 | 40.00        | 5.71         | Inactive    | 3604.25   | 1172.75 | 154        | 1.00         | 22            | 2.00            |
| 7.00                     | 3.00               | 300.00       | 21.43        | 3.00                 | 600.00       | 85.71        | Active      | 2594.75   | 1174.75 | 164.5      | 1.00         | 32.9          | 3.00            |
| 7.00                     | 1.00               | 300.00       | 7.14         | 1.00                 | 200.00       | 28.57        | Inactive    | 3199.25   | 892.75  | 148        | 0.00         | 21.143        | 2.00            |
| 6.00                     | 3.00               | 30.00        | 20.00        | 2.00                 | 560.00       | 80.00        | Inactive    | 4397.5    | 1503    | 95.5       | 0.00         | 13.643        | 1.00            |
| 6.00                     | 1.00               | 60.00        | 471.43       | 4.00                 | 24720.00     | 3531.43      | Active      | 3113.25   | 2242.25 | 460.5      | 1.00         | 65.786        | 4.00            |
| 6.00                     | 0.00               | 120.00       | 12.86        | 2.00                 | 360.00       | 51.43        | Inactive    | 3231.75   | 902.5   | 275.75     | 1.00         | 39.393        | 4.00            |
| 6.00                     | 2.00               | 180.00       | 85.71        | 4.00                 | 2400.00      | 342.86       | Active      | 2928.75   | 1883.25 | 359        | 1.00         | 51.286        | 4.00            |
| 5.00                     | 0.00               |              | 6.43         | 1.00                 | 180.00       | 25.71        | Inactive    | 3215      | 1038.5  | 106.5      | 0.00         | 15.214        | 1.00            |
| 4.00                     | 1.00               | 90.00        | 514.29       | 4.00                 | 14400.00     | 2057.14      | Active      | 2854.25   | 1386.5  | 208.25     | 1.00         | 41.65         | 4.00            |
| 7.00                     |                    | 660.00       | 20.00        | 2.00                 | 560.00       | 80.00        | Inactive    | 2105.5    | 830     | 167.5      | 1.00         | 23.929        | 2.00            |

|      |      |        |        |      |         |        |          |         |         |        |      |        |      |
|------|------|--------|--------|------|---------|--------|----------|---------|---------|--------|------|--------|------|
| 6.00 | 2.00 | 120.00 | 180.00 | 4.00 | 5040.00 | 720.00 | Active   | 2662.75 | 1031.75 | 257.5  | 1.00 | 36.786 | 3.00 |
| 6.00 | 1.00 | 30.00  | 165.00 | 4.00 | 4620.00 | 660.00 | Active   | 2514.25 | 651.25  | 52.5   | 0.00 | 8.75   | 1.00 |
| 4.00 | 0.00 | 120.00 | 90.00  | 4.00 | 2520.00 | 360.00 | Active   | 2573.5  | 866     | 74.5   | 0.00 | 10.643 | 1.00 |
| 4.00 | 0.00 | 300.00 | 30.00  | 3.00 | 3720.00 | 531.43 | Active   | 4745    | 990.5   | 179.5  | 1.00 | 22.438 | 2.00 |
| 5.00 | 1.00 | 300.00 | 85.71  | 4.00 | 2400.00 | 342.86 | Active   | 3144.75 | 1591    | 146.25 | 0.00 | 18.281 | 2.00 |
| 5.00 | 0.00 | 600.00 | 64.29  | 4.00 | 1800.00 | 257.14 | Active   | 3053.75 | 2222.25 | 221    | 1.00 | 31.571 | 3.00 |
| 6.00 | 0.00 | 420.00 | 30.00  | 3.00 | 840.00  | 120.00 | Active   | 3761.5  | 1024.5  | 107    | 0.00 | 13.375 | 1.00 |
| 5.00 | 3.00 | 420.00 | 98.57  | 4.00 | 2760.00 | 394.29 | Active   |         |         |        |      |        |      |
| 6.00 | 0.00 | 360.00 | 15.00  | 2.00 | 420.00  | 60.00  | Inactive | 3874    | 1315.5  | 289.5  | 1.00 | 41.357 | 4.00 |
| 5.00 | 1.00 | 240.00 | 45.00  | 4.00 | 1260.00 | 180.00 | Active   | 3458.25 | 1549.5  | 211.25 | 1.00 | 26.406 | 3.00 |
| 5.00 | 1.00 | 120.00 | 17.14  | 2.00 | 480.00  | 68.57  | Inactive | 2008    | 623.25  | 172.75 | 1.00 | 34.55  | 3.00 |
| 6.00 | 2.00 | 180.00 | 12.86  | 2.00 | 360.00  | 51.43  | Inactive | 2831.25 | 1087.75 | 82     | 0.00 | 11.714 | 1.00 |
| 4.00 | 2.00 | 480.00 | 40.00  | 3.00 | 1120.00 | 160.00 | Active   | 3891.25 | 1092    | 409.75 | 1.00 | 58.536 | 4.00 |
| 6.00 | 1.00 | 600.00 | 25.00  | 3.00 | 700.00  | 100.00 | Active   | 2619.5  | 1015    | 115.5  | 0.00 | 19.25  | 2.00 |
| 5.00 | 0.00 | 600.00 | 0.00   | 1.00 | 0.00    | 0.00   | Inactive | 3188.25 | 472.5   | 45.25  | 0.00 | 6.464  | 1.00 |
| 6.00 | 1.00 | 180.00 | 30.00  | 3.00 | 840.00  | 120.00 | Active   | 2611.75 | 1352.5  | 193.75 | 1.00 | 32.292 | 3.00 |
| 6.00 | 3.00 | 480.00 | 68.57  | 4.00 | 1920.00 | 274.29 | Active   | 2226.75 | 1073.75 | 188.5  | 1.00 | 37.7   | 4.00 |
| 7.00 | 1.00 |        | 25.00  | 3.00 | 700.00  | 100.00 | Active   | 3991.75 | 1843.5  | 263.75 | 1.00 | 37.679 | 4.00 |
| 6.00 | 2.00 | 390.00 | 77.14  | 4.00 | 2160.00 | 308.57 | Active   | 3249.5  | 2097.5  | 367    | 1.00 | 52.429 | 4.00 |
| 7.00 | 3.00 | 360.00 | 34.29  | 3.00 | 960.00  | 137.14 | Active   | 3297.25 | 932     | 72.75  | 0.00 | 12.125 | 1.00 |
| 5.00 | 2.00 | 540.00 | 64.29  | 4.00 | 1800.00 | 257.14 | Active   | 1496.5  | 424.5   | 104    | 0.00 | 20.8   | 2.00 |
| 6.00 | 1.00 | 540.00 | 1.43   | 1.00 | 40.00   | 5.71   | Inactive | 4020.25 | 1209.5  | 221.25 | 1.00 | 31.607 | 3.00 |
| 5.00 | 1.00 | 540.00 | 8.57   | 1.00 | 240.00  | 34.29  | Inactive | 3299.5  | 1173.75 | 108.75 | 0.00 | 15.536 | 1.00 |
| 2.00 | 1.00 | 600.00 | 25.71  | 3.00 | 720.00  | 102.86 | Active   | 2426.5  | 1517.25 | 260.25 | 1.00 | 37.179 | 3.00 |
| 5.00 | 2.00 | 540.00 | 15.00  | 2.00 | 420.00  | 60.00  | Inactive | 3920.25 | 1788.75 | 289    | 1.00 | 41.286 | 4.00 |
| 6.00 | 1.00 | 420.00 | 10.71  | 2.00 | 300.00  | 42.86  | Inactive | 2537.5  | 1542.75 | 176.75 | 1.00 | 25.25  | 2.00 |
| 6.00 | 0.00 | 360.00 | 2.86   | 1.00 | 80.00   | 11.43  | Inactive | 5385.5  | 655.75  | 24.75  | 0.00 | 3.536  | 1.00 |
| 4.00 | 2.00 | 720.00 | 4.29   | 1.00 | 120.00  | 17.14  | Inactive | 3973    | 1610.75 | 220.25 | 1.00 | 31.464 | 3.00 |
| 5.00 | 1.00 | 360.00 | 120.00 | 4.00 | 3360.00 | 480.00 | Active   | 3222.75 | 1623.25 | 554    | 1.00 | 79.143 | 4.00 |
| 5.00 | 2.00 | 240.00 | 14.29  | 2.00 | 400.00  | 57.14  | Inactive | 3675.75 | 1419.75 | 248.5  | 1.00 | 35.5   | 3.00 |
| 5.00 | 0.00 | 360.00 | 15.00  | 2.00 | 420.00  | 60.00  | Inactive | 2272.5  | 577.75  | 73.75  | 0.00 | 14.75  | 1.00 |
| 7.00 | 0.00 | 540.00 | 0.00   | 1.00 | 0.00    | 0.00   | Inactive | 1654.75 | 517.5   | 43.75  | 0.00 | 7.292  | 1.00 |
| 6.00 | 2.00 |        | 32.14  | 3.00 | 900.00  | 128.57 | Active   | 2523.75 | 884.5   | 198.75 | 1.00 | 28.393 | 3.00 |
| 7.00 | 0.00 | 120.00 | 51.43  | 4.00 | 1440.00 | 205.71 | Active   | 3954    | 523     | 82     | 0.00 | 11.714 | 1.00 |
| 4.00 | 3.00 | 20.00  | 6.43   | 1.00 | 180.00  | 25.71  | Inactive | 4244.75 | 2184.5  | 608.75 | 1.00 | 76.094 | 4.00 |
| 4.00 | 1.00 | 590.00 | 25.71  | 3.00 | 720.00  | 102.86 | Active   | 2791.25 | 776     | 142.75 | 0.00 | 20.393 | 2.00 |
| 5.00 | 1.00 | 300.00 | 4.29   | 1.00 | 120.00  | 17.14  | Inactive | 3639.75 | 1557    | 177.25 | 1.00 | 22.156 | 2.00 |
| 5.00 | 1.00 | 300.00 | 4.29   | 1.00 | 120.00  | 17.14  | Inactive | 4393.5  | 1166.5  | 291    | 1.00 | 36.375 | 3.00 |
| 6.00 | 0.00 | 150.00 | 94.29  | 4.00 | 3840.00 | 548.57 | Active   | 3619.5  | 1218.25 | 286.25 | 1.00 | 35.781 | 3.00 |
| 3.00 | 1.00 | 300.00 | 30.00  | 3.00 | 840.00  | 120.00 | Active   | 3466.75 | 1180.75 | 119.5  | 0.00 | 14.938 | 1.00 |
| 6.00 | 0.00 | 600.00 | 17.14  | 2.00 | 480.00  | 68.57  | Inactive | 3539.25 | 887.25  | 237.5  | 1.00 | 33.929 | 3.00 |
| 3.00 | 0.00 | 390.00 | 60.00  | 4.00 | 1680.00 | 240.00 | Active   | 3723.5  | 1679.5  | 188    | 1.00 | 26.857 | 3.00 |

|      |      |        |        |      |          |         |          |         |         |        |      |        |      |
|------|------|--------|--------|------|----------|---------|----------|---------|---------|--------|------|--------|------|
| 5.00 | 0.00 | 60.00  | 15.00  | 2.00 | 420.00   | 60.00   | Inactive | 3261    | 1693.25 | 161.75 | 1.00 | 23.107 | 2.00 |
| 5.00 | 0.00 | 120.00 | 77.14  | 4.00 | 2160.00  | 308.57  | Active   | 3268.5  | 1223.75 | 385.75 | 1.00 | 55.107 | 4.00 |
| 6.00 | 0.00 | 240.00 | 12.86  | 2.00 | 360.00   | 51.43   | Inactive | 2770.5  | 438.25  | 85.25  | 0.00 | 12.179 | 1.00 |
| 6.00 | 1.00 | 450.00 | 68.57  | 4.00 | 1920.00  | 274.29  | Active   | 1813    | 744     | 194    | 1.00 | 38.8   | 4.00 |
| 7.00 | 1.00 | 480.00 | 21.43  | 3.00 | 600.00   | 85.71   | Active   | 3084.25 | 1185.25 | 342.5  | 1.00 | 48.929 | 4.00 |
| 5.00 | 0.00 | 240.00 | 21.43  | 3.00 | 600.00   | 85.71   | Active   | 3445.25 | 1275.5  | 625.25 | 1.00 | 89.321 | 4.00 |
| 7.00 | 0.00 | 600.00 | 17.14  | 2.00 | 480.00   | 68.57   | Inactive | 3662.75 | 1483.75 | 216.5  | 1.00 | 30.929 | 3.00 |
| 5.00 | 0.00 | 120.00 | 308.57 | 4.00 | 16320.00 | 2331.43 | Active   | 2136.75 | 857.5   | 150.75 | 1.00 | 21.536 | 2.00 |
| 6.00 | 1.00 | 60.00  | 17.14  | 2.00 | 480.00   | 68.57   | Inactive | 2353.5  | 881.75  | 144.75 | 1.00 | 24.125 | 2.00 |
| 5.00 | 2.00 | 300.00 | 6.43   | 1.00 | 180.00   | 25.71   | Inactive | 4166.5  | 1490.5  | 78     | 0.00 | 11.143 | 1.00 |
| 6.00 | 2.00 | 120.00 | 15.00  | 2.00 | 420.00   | 60.00   | Inactive | 1954    | 1448.5  | 376.5  | 1.00 | 53.786 | 4.00 |
| 6.00 | 1.00 | 420.00 | 14.29  | 2.00 | 400.00   | 57.14   | Inactive | 1305    | 631     | 61     | 0.00 | 12.2   | 1.00 |
| 6.00 | 1.00 | 240.00 | 21.43  | 3.00 | 600.00   | 85.71   | Active   | 3877.75 | 1058.25 | 86     | 0.00 | 12.286 | 1.00 |
| 5.00 | 2.00 | 75.00  | 53.57  | 4.00 | 1500.00  | 214.29  | Active   |         |         |        |      |        |      |
| 2.00 | 1.00 | 300.00 | 17.14  | 2.00 | 480.00   | 68.57   | Inactive | 2546.5  | 767.75  | 84.75  | 0.00 | 12.107 | 1.00 |



|             |                         |        |        |        |      |         |        |          |         |         |        |      |      |
|-------------|-------------------------|--------|--------|--------|------|---------|--------|----------|---------|---------|--------|------|------|
| 380.3928571 | Visit 5 (29 - 33        | 60.00  | 210.00 | 30.00  | 3.00 | 840.00  | 120.00 | Active   | 999     | 241.25  | 21.75  | 0    | 0    |
| 419.0416667 | Visit 5 (29 - 33 weeks) |        | 50.00  | 7.14   | 2.00 | 200.00  | 28.57  | Inactive |         |         |        |      |      |
| 367.6428571 | Visit 5 (29 - 33        | 300.00 | 360.00 | 51.43  | 4.00 | 1440.00 | 205.71 | Active   | 2481.5  | 1353.25 | 82.25  | 0.5  | 0.5  |
| 593.125     | Visit 5 (29 - 33 weeks) |        |        |        |      |         |        |          |         |         |        |      |      |
| 393.09375   | Visit 5 (29 - 33        | 480.00 | 120.00 | 17.14  | 2.00 | 480.00  | 68.57  | Inactive | 1901    | 502.25  | 80     | 10.5 | 0.25 |
| 436.25      | Visit 5 (29 - 33 weeks) |        |        |        |      |         |        |          |         |         |        |      |      |
| 470.1875    | Visit 5 (29 - 33        | 480.00 | 570.00 | 81.43  | 4.00 | 2280.00 | 325.71 | Active   | 3506.75 | 510.75  | 27.75  | 0.75 | 0    |
|             | Visit 5 (29 - 33        | 120.00 | 780.00 | 111.43 | 4.00 | 3120.00 | 445.71 | Active   | 6235.25 | 1734.25 | 138    | 3.25 | 0.25 |
| 553.4285714 | Visit 5 (29 - 33        | 240.00 | 210.00 | 30.00  | 3.00 | 840.00  | 120.00 | Active   |         |         |        |      |      |
| 432.28125   | Visit 5 (29 - 33 weeks) |        |        |        |      |         |        |          |         |         |        |      |      |
| 401.6       | Visit 5 (29 - 33        | 420.00 | 300.00 | 42.86  | 4.00 | 1200.00 | 171.43 | Active   |         |         |        |      |      |
| 404.4642857 | Visit 5 (29 - 33        | 360.00 | 90.00  | 12.86  | 2.00 | 360.00  | 51.43  | Inactive | 3815.5  | 1016.25 | 28     | 0.25 | 0    |
| 555.8928571 | Visit 5 (29 - 33        | 360.00 | 480.00 | 68.57  | 4.00 | 1920.00 | 274.29 | Active   | 4051.75 | 712     | 95.75  | 0.5  | 0    |
| 436.5833333 | Visit 5 (29 - 33        | 210.00 | 840.00 | 120.00 | 4.00 | 5040.00 | 720.00 | Active   | 214.5   | 17.5    | 2      | 0    | 0    |
| 455.4642857 | Visit 5 (29 - 33        | 300.00 | 60.00  | 8.57   | 2.00 | 240.00  | 34.29  | Inactive | 2775    | 496.5   | 66     | 0.5  | 0    |
| 435.2916667 | Visit 5 (29 - 33        | 240.00 | 100.00 | 14.29  | 2.00 | 400.00  | 57.14  | Inactive | 2483.5  | 1023.75 | 96.5   | 0.25 | 0    |
| 445.35      | Visit 5 (29 - 33        | 180.00 | 480.00 | 68.57  | 4.00 | 1920.00 | 274.29 | Active   |         |         |        |      |      |
| 570.25      | Visit 5 (29 - 33        | 240.00 | 0.00   | 0.00   | 1.00 | 0.00    | 0.00   | Inactive | 1722    | 922.25  | 121.75 | 1.75 | 0.25 |
| 464.2142857 | Visit 5 (29 - 33 weeks) |        |        |        |      |         |        |          |         |         |        |      |      |
| 549.5416667 | Visit 5 (29 - 33        | 360.00 | 30.00  | 4.29   | 1.00 | 120.00  | 17.14  | Inactive | 5320.75 | 1453.75 | 208.5  | 1.5  | 0.25 |
| 299.3       | Visit 5 (29 - 33        | 360.00 | 210.00 | 30.00  | 3.00 | 840.00  | 120.00 | Active   | 3047    | 844.25  | 186.75 | 2    | 0    |
| 574.3214286 | Visit 5 (29 - 33        | 420.00 | 30.00  | 4.29   | 1.00 | 120.00  | 17.14  | Inactive | 4598.25 | 1706.5  | 123.25 | 2    | 0    |
| 471.3571429 | Visit 5 (29 - 33        | 60.00  | 540.00 | 77.14  | 4.00 | 2160.00 | 308.57 | Active   | 3004.75 | 777     | 45.5   | 0.75 | 0    |
| 346.6428571 | Visit 5 (29 - 33        | 180.00 | 180.00 | 25.71  | 3.00 | 720.00  | 102.86 | Active   | 3251.25 | 920     | 63     | 1.75 | 0    |
| 560.0357143 | Visit 5 (29 - 33        | 180.00 | 420.00 | 60.00  | 4.00 | 1680.00 | 240.00 | Active   | 3314.5  | 1540    | 263    | 0.5  | 0    |
| 362.5       | Visit 5 (29 - 33 weeks) |        |        |        |      |         |        |          |         |         |        |      |      |
| 769.3571429 | Visit 5 (29 - 33        | 660.00 | 0.00   | 0.00   | 1.00 | 0.00    | 0.00   | Inactive | 4737.5  | 688.25  | 59.75  | 0.5  | 0    |
| 567.5714286 | Visit 5 (29 - 33        | 600.00 | 270.00 | 38.57  | 3.00 | 1080.00 | 154.29 | Active   | 3182.5  | 1576.25 | 131    | 1.25 | 0    |
| 460.3928571 | Visit 5 (29 - 33        | 180.00 | 630.00 | 90.00  | 4.00 | 2520.00 | 360.00 | Active   | 2999.25 | 1050.5  | 186    | 0.25 | 0    |
| 525.1071429 | Visit 5 (29 - 33 weeks) |        |        |        |      |         |        |          |         |         |        |      |      |
| 454.5       | Visit 5 (29 - 33        | 420.00 | 60.00  | 8.57   | 2.00 | 240.00  | 34.29  | Inactive |         |         |        |      |      |
| 275.7916667 | Visit 5 (29 - 33        | 120.00 | 150.00 | 21.43  | 3.00 | 600.00  | 85.71  | Active   | 3368.75 | 1698.75 | 151.25 | 0.25 | 0    |
| 360.5357143 | Visit 5 (29 - 33        | 150.00 | 100.00 | 14.29  | 2.00 | 400.00  | 57.14  | Inactive | 2452.5  | 830.25  | 147.5  | 3.75 | 0    |
| 564.8571429 | Visit 5 (29 - 33        | 240.00 | 0.00   | 0.00   | 1.00 | 0.00    | 0.00   | Inactive | 3797.5  | 587     | 35.25  | 0.25 | 0    |
| 530.59375   | Visit 5 (29 - 33        | 300.00 | 45.00  | 6.43   | 1.00 | 180.00  | 25.71  | Inactive | 3337.75 | 1606.75 | 195    | 2.25 | 0.25 |
| 398.75      | Visit 5 (29 - 33        | 360.00 | 45.00  | 6.43   | 1.00 | 180.00  | 25.71  | Inactive | 3710    | 1622.5  | 116.25 | 4    | 0.25 |
| 454.96875   | Visit 5 (29 - 33        | 20.00  | 10.00  | 1.43   | 1.00 | 40.00   | 5.71   | Inactive |         |         |        |      |      |
| 549.1875    | Visit 5 (29 - 33        | 420.00 | 30.00  | 4.29   | 1.00 | 120.00  | 17.14  | Inactive | 2997    | 925.5   | 134.5  | 2    | 0    |
| 452.4375    | Visit 5 (29 - 33        | 360.00 | 50.00  | 7.14   | 2.00 | 200.00  | 28.57  | Inactive | 2898.75 | 1178.5  | 246    | 0.75 | 0    |
| 433.34375   | Visit 5 (29 - 33        | 120.00 | 15.00  | 2.14   | 1.00 | 60.00   | 8.57   | Inactive |         |         |        |      |      |
| 505.6071429 | Visit 5 (29 - 33        | 750.00 | 100.00 | 14.29  | 2.00 | 400.00  | 57.14  | Inactive | 1259.5  | 261     | 43     | 0.5  | 0    |
| 531.9285714 | Visit 5 (29 - 33        | 120.00 | 210.00 | 30.00  | 3.00 | 840.00  | 120.00 | Active   | 3034.75 | 712.25  | 64.25  | 3.75 | 0    |





| Total MVPA | V5_Average M | V5_Quartile of | V5_Sedentary | V5_Accelerom | Accelerometer | GPAQ_Change<br>in PA |
|------------|--------------|----------------|--------------|--------------|---------------|----------------------|
| 129.5      | 21.583       | 3.00           | 332.375      | 1            | -12.86        | -34.29               |
| 167.75     | 23.964       | 4.00           | 386.0357143  | 1            | -1.29         | 19.29                |
| 65         | 9.286        | 1.00           | 375.3928571  | 0            | -13.65        | 64.29                |
| 153.5      | 21.929       | 3.00           | 622.1785714  | 1            | -23.04        | 8.57                 |
| 153.75     | 21.964       | 3.00           | 449.0714286  | 1            | -20.57        | 14.29                |
| 90.75      | 12.964       | 2.00           | 293.8214286  | 0            | -54.75        | 10.71                |
| 91.75      | 15.292       | 2.00           | 259.375      | 0            | -20.77        | 65.71                |
|            |              |                |              |              |               |                      |
| 255.25     | 36.464       | 4.00           | 371.5714286  | 1            | 13.11         | -21.43               |
| 31.75      | 5.292        | 1.00           | 146.5416667  | 0            | -14.86        | -60.00               |
| 25.25      | 4.208        | 1.00           | 168.5416667  | 0            | -15.86        | 28.57                |
| 71.5       | 10.214       | 2.00           | 586.8571429  | 0            | -13.97        | 0.00                 |
| 83.25      | 13.875       | 2.00           | 138.9166667  | 0            | 9.33          | 0.00                 |
| 169.25     | 24.179       | 4.00           | 414.8571429  | 1            | -12.47        | 7.14                 |
| 187        | 23.375       | 3.00           | 288.78125    | 1            | -5.52         | 281.43               |
| 77.25      | 11.036       | 2.00           | 455.6071429  | 0            | -17.96        | -8.57                |
| 128.5      | 18.357       | 3.00           | 431.1071429  | 0            | -1.68         | 2.86                 |
| 42.5       | 6.071        | 1.00           | 280.0714286  | 0            | -15.39        | 5.71                 |
| 57         | 8.143        | 1.00           | 450.2857143  | 0            | -9.07         | 25.71                |
| 88.25      | 14.708       | 2.00           | 469.25       | 0            | -19.04        | 145.71               |
| 184.25     | 26.321       | 4.00           | 319          | 1            | 10.68         | 42.86                |
| 129        | 21.5         | 3.00           | 384.5416667  | 1            | -83.17        | 18.57                |
| 198.25     | 28.321       | 4.00           | 519.5714286  | 1            | 28.32         | 5.00                 |
| 379        | 54.143       | 4.00           | 611.7142857  | 1            | 28.07         | 8.57                 |
| 195.25     | 27.893       | 4.00           | 361.8928571  | 1            | -10.04        | -35.71               |
|            |              |                |              |              |               |                      |
| 215.25     | 35.875       | 4.00           | 446.7083333  | 1            | -8.88         | -185.71              |
|            |              |                |              |              |               |                      |
| 110        | 18.333       | 3.00           | 455.125      | 0            | -3.67         | 32.86                |
| 221.25     | 31.607       | 4.00           | 1035.535714  | 1            | -1.29         | 14.29                |
| 14.75      | 2.107        | 1.00           | 141.6071429  | 0            | -19.04        | 7.14                 |
| 91.25      | 13.036       | 2.00           | 513.3928571  | 0            | -0.61         | -20.00               |
| 43         | 6.143        | 1.00           | 779.9642857  | 0            | -59.64        | -450.00              |
| 292.75     | 36.594       | 4.00           | 479.28125    | 1            | -2.80         | -8.57                |
| 65.5       | 10.917       | 2.00           | 491.4583333  | 0            | -40.37        | -50.71               |
| 209        | 29.857       | 4.00           | 434.25       | 1            | 14.64         | 10.71                |
| 286        | 40.857       | 4.00           | 491.2857143  | 1            | -0.79         | -499.29              |
|            |              |                |              |              |               |                      |

|        |        |      |             |   |        |         |
|--------|--------|------|-------------|---|--------|---------|
| 21.75  | 4.35   | 1.00 | 199.8       | 0 | -32.44 | -150.00 |
| 83.25  | 13.875 | 2.00 | 413.5833333 | 0 | 3.23   | -38.57  |
| 90.75  | 12.964 | 2.00 | 271.5714286 | 0 | -5.32  | -68.57  |
| 28.5   | 4.071  | 1.00 | 500.9642857 | 0 | -9.30  | 51.43   |
| 141.5  | 20.214 | 3.00 | 890.75      | 0 | 20.21  | 12.86   |
|        |        |      |             |   |        |         |
|        |        |      |             |   |        |         |
| 28.25  | 4.036  | 1.00 | 545.0714286 | 0 | -7.68  | 0.00    |
| 96.25  | 13.75  | 2.00 | 578.8214286 | 0 | -44.79 | 28.57   |
| 2      | 0.5    | 1.00 | 53.625      | 0 | -18.75 | 95.00   |
| 66.5   | 9.5    | 1.00 | 396.4285714 | 0 | 3.04   | 8.57    |
| 96.75  | 12.094 | 2.00 | 310.4375    | 0 | -20.20 | -15.71  |
|        |        |      |             |   |        |         |
| 123.75 | 20.625 | 3.00 | 287         | 0 | -17.05 | -25.00  |
|        |        |      |             |   |        |         |
| 210.25 | 10.513 | 2.00 | 266.0375    | 0 | -1.61  | -30.00  |
| 188.75 | 23.594 | 4.00 | 380.875     | 1 | 2.79   | -34.29  |
| 125.25 | 13.917 | 2.00 | 510.9166667 | 0 | -17.69 | 2.86    |
| 46.25  | 7.708  | 1.00 | 500.7916667 | 0 | -7.83  | 68.57   |
| 64.75  | 9.25   | 1.00 | 464.4642857 | 0 | -27.93 | 0.00    |
| 263.5  | 43.917 | 4.00 | 552.4166667 | 1 | 2.63   | 45.00   |
|        |        |      |             |   |        |         |
| 60.25  | 8.607  | 1.00 | 676.7857143 | 0 | 5.07   | -2.86   |
| 132.25 | 18.893 | 3.00 | 454.6428571 | 0 | -12.57 | 34.29   |
| 186.25 | 31.042 | 4.00 | 499.875     | 1 | -48.10 | -30.00  |
|        |        |      |             |   |        |         |
|        |        |      |             |   |        |         |
| 151.5  | 21.643 | 3.00 | 481.25      | 1 | 14.35  | 21.43   |
| 151.25 | 21.607 | 3.00 | 350.3571429 | 1 | -6.79  | -17.86  |
| 35.5   | 5.071  | 1.00 | 542.5       | 0 | -6.64  | -51.43  |
| 197.5  | 19.75  | 3.00 | 333.775     | 0 | -56.34 | 0.00    |
| 120.5  | 17.214 | 3.00 | 530         | 0 | -3.18  | -19.29  |
|        |        |      |             |   |        |         |
| 136.5  | 17.063 | 3.00 | 374.625     | 0 | -19.31 | 0.00    |
| 246.75 | 30.844 | 4.00 | 362.34375   | 1 | -4.94  | -87.14  |
|        |        |      |             |   |        |         |
| 43.5   | 10.875 | 2.00 | 314.875     | 0 | -23.05 | -2.86   |
| 68     | 9.714  | 2.00 | 433.5357143 | 0 | -17.14 | -30.00  |

|        |        |      |             |   |        |         |
|--------|--------|------|-------------|---|--------|---------|
|        |        |      |             |   |        |         |
| 117.75 | 19.625 | 3.00 | 458.2083333 | 0 | -35.48 | -55.71  |
| 115    | 16.429 | 2.00 | 241.75      | 0 | 4.25   | 0.00    |
| 21     | 4.2    | 1.00 | 123.5       | 0 | -34.60 | -38.57  |
| 205    | 29.286 | 4.00 | 312.4642857 | 1 | -19.64 | -18.57  |
| 440    | 62.857 | 4.00 | 496.9642857 | 1 | -26.46 | 68.57   |
|        |        |      |             |   |        |         |
| 117    | 16.714 | 3.00 | 442.6428571 | 0 | -4.82  | -295.71 |
| 21.5   | 3.583  | 1.00 | 169.5833333 | 0 | -20.54 | -10.71  |
| 184.75 | 26.393 | 4.00 | 547.1071429 | 1 | 15.25  | 10.71   |
| 134.75 | 16.844 | 3.00 | 301.96875   | 0 | -36.94 | -2.14   |
| 101.75 | 14.536 | 2.00 | 324         | 0 | 2.34   | 28.57   |
|        |        |      |             |   |        |         |
| 110.75 | 15.821 | 2.00 | 431.9642857 | 0 | 15.82  | -27.86  |
|        |        |      |             |   |        |         |
